# Supplementary material
Source: PubMed Central journal article supplement (PMC6602051)
Supplement: NIHMS1524330-supplement-3.pdf [file NIHMS1524330-supplement-3.pdf]

**Supplemental Table 1.** Clinical characteristics of 51 recruited patients.

|                                           | <b>OA</b><br>(n=15) | <b>leukocyte-poor RA</b><br>(n=17) | <b>leukocyte-rich RA</b><br>(n=19) |
|-------------------------------------------|---------------------|------------------------------------|------------------------------------|
| <b>Demographic variables</b>              |                     |                                    |                                    |
| Age, mean<br>(Range)                      | 71<br>(64-81)       | 64.2<br>(42-79)                    | 57.3<br>(36-71)                    |
| Females, n (%)                            | 10 (66.7)           | 15 (82.4)                          | 14 (73.7)                          |
| <b>RA-related variables</b>               |                     |                                    |                                    |
| Mean years of disease duration<br>(range) |                     | 15.7<br>(<1-51)                    | 5.5*<br>(<1-29)                    |
| RF positive, n (%)                        |                     | 8 (47.1)                           | 16* (84.2)                         |
| CCP positive, n (%)                       |                     | 10 (58.8)                          | 14 (73.7)                          |
| <b>DMARDs</b>                             |                     |                                    |                                    |
| Prednisone, n (%)                         |                     | 10 (55.6)                          | 4* (22.2)                          |
| Methotrexate, n (%)                       |                     | 7 (41.2)                           | 3 (15.8)                           |
| TNFi, n (%)                               |                     | 4 (23.5)                           | 2 (10.5)                           |
| Rituximab, n (%)                          |                     | 0 (0)                              | 1 (5.3)                            |
| Abatacept, n (%)                          |                     | 1 (5.9)                            | 1 (5.3)                            |
| Tofacitinib, n (%)                        |                     | 2 (11.8)                           | 1 (5.3)                            |

DMARDs = Disease-Modifying Antirheumatic Drugs.

TNFi = TNF inhibitors (infliximab, etanercept, adalimumab, Golimumab).

RhF = Rheumatoid Factor. CCP = Cyclic Citrullinated Peptide.

\*Significant p-value between leukocyte-poor RA and leukocyte-rich RA.

**Supplemental Table 2.** Antibody staining and fixation of mass cytometry panel.

| <b>marker</b>     | <b>clone</b> | <b>Metal</b> | <b>Dilution</b> |
|-------------------|--------------|--------------|-----------------|
| CD45              | HI30         | 141Pr        | 1:100           |
| CD19              | HIB19        | 142Nd        | 1:100           |
| RANKL             | MIH24        | 143Nd        | 1:50            |
| CD64              | 10.1         | 144Nd        | 1:100           |
| CD16              | 3G8          | 145Nd        | 1:100           |
| CD8a              | RPA T8       | 146Nd        | 1:100           |
| FAP               | Poly         | 147Sm        | 1:50            |
| CD20              | 2H7          | 148Nd        | 1:100           |
| CD45RO            | UCHL1        | 149Sm        | 1:100           |
| CD38              | HIT2         | 150Nd        | 1:100           |
| CD279/PD-1        | EH12.2H7     | 151Eu        | 1:100           |
| CD14              | M5E2         | 152Sm        | 1:100           |
| CD69              | FN50         | 153Eu        | 1:100           |
| CD185/CXCR5       | J252D4       | 154Sm        | 1:100           |
| CD4               | RPA T4       | 155Gd        | 1:100           |
| Podoplanin        | NC-08        | 156Gd        | 1:100           |
| CD3               | UCHT1        | 158Gd        | 1:100           |
| CD11c             | Bu15         | 159Tb        | 1:100           |
| CD307d/FcRL4      | 413D12       | 160Gd        | 1:100           |
| CD138             | MI15         | 161Dy        | 1:100           |
| CD90              | 5.00E+10     | 162Dy        | 1:50            |
| CCR2              | K036C2       | 163Dy        | 1:100           |
| Cadherin 11       | 3C10         | 164Dy        | 2:25            |
| FoxP3             | PCH101       | 165Ho        | 1:50            |
| CD34              | 581          | 166Er        | 1:100           |
| CD146/MCAM        | SHM-57       | 167Er        | 1:50            |
| IgA               | 9H9H11       | 168Er        | 1:100           |
| ICOS              | C398.4A      | 170Er        | 1:100           |
| CD66b             | G10F5        | 171Yb        | 1:100           |
| IgM               | MHM-88       | 172Yb        | 1:200           |
| CD144/VE-Cadherin | BV9          | 173Yb        | 1:100           |
| HLA-DR            | L243         | 174Yb        | 1:100           |
| IgD               | IA6-2        | 175Lu        | 1:100           |
| CD106/VCAM-1      | STA          | 176Yb        | 1:100           |

**Supplemental Table 3.** Identified mass cytometry populations with proportion of cells from each disease cohort and on tailed FDR q value.

| Cell type  | mass cytometry cluster                                                                      | # Cells | Cells from OA (%) | Cells from leukocyte-poor RA (%) | Cells from leukocyte-rich RA (%) | One-sided FDR q value |
|------------|---------------------------------------------------------------------------------------------|---------|-------------------|----------------------------------|----------------------------------|-----------------------|
| Fibroblast | THY1 <sup>-</sup> Cadherin-11 <sup>-</sup>                                                  | 4,333   | 48.3              | 45.7                             | 6.0                              | 1.00                  |
|            | THY1 <sup>-</sup> Cadherin-11 <sup>+</sup>                                                  | 3,752   | 55.8              | 40.9                             | 3.3                              | 1.00                  |
|            | THY1 <sup>-</sup> CD34 <sup>+</sup> HLA-DR <sup>hi</sup>                                    | 1,474   | 42.5              | 44.2                             | 13.3                             | 1.00                  |
|            | THY1 <sup>-</sup> CD34 <sup>-</sup> HLA-DR <sup>hi</sup>                                    | 4,171   | 50.2              | 28.3                             | 21.5                             | 1.00                  |
|            | THY1 <sup>+</sup> CD34 <sup>-</sup> HLA-DR <sup>hi</sup>                                    | 2,577   | 7.1               | 9.4                              | 83.4                             | 5.8E-04               |
|            | THY1 <sup>+</sup> CD34 <sup>-</sup> HLA-DR <sup>lo</sup>                                    | 3,794   | 38.1              | 38.6                             | 23.3                             | 1.00                  |
|            | THY1 <sup>+</sup> CD34 <sup>+</sup> HLA-DR <sup>lo</sup>                                    | 3,514   | 52.0              | 40.9                             | 7.1                              | 1.00                  |
|            | THY1 <sup>+</sup> CD34 <sup>+</sup> HLA-DR <sup>hi</sup>                                    | 1,546   | 9.8               | 10.2                             | 80.0                             | 1.2E-03               |
| Monocyte   | CD11c <sup>-</sup>                                                                          | 2,801   | 58.0              | 33.4                             | 8.6                              | 1.00                  |
|            | CD11c <sup>+</sup> CCR2 <sup>+</sup>                                                        | 5,602   | 32.6              | 24.2                             | 43.2                             | 0.72                  |
|            | CD11c <sup>+</sup> CD38 <sup>-</sup>                                                        | 1,313   | 37.0              | 54.8                             | 8.2                              | 1.00                  |
|            | CD11c <sup>+</sup> CD38 <sup>-</sup> CD64 <sup>+</sup>                                      | 1,031   | 37.9              | 43.7                             | 18.3                             | 1.00                  |
|            | CD11c <sup>+</sup> CD38 <sup>+</sup>                                                        | 4,551   | 20.0              | 13.1                             | 66.9                             | 9.5E-04               |
| T cell     | CD4 <sup>-</sup> CD8 <sup>-</sup>                                                           | 2,475   | 44.6              | 34.5                             | 20.9                             | 1.00                  |
|            | CD4 <sup>+</sup> CCR2 <sup>+</sup>                                                          | 4,093   | 51.7              | 28.7                             | 19.6                             | 1.00                  |
|            | CD4 <sup>+</sup> HLA-DR <sup>+</sup>                                                        | 1,178   | 29.3              | 62.3                             | 8.4                              | 1.00                  |
|            | CD4 <sup>+</sup> PD-1 <sup>+</sup> ICOS <sup>-</sup>                                        | 2,368   | 33.7              | 37.1                             | 29.1                             | 1.00                  |
|            | CD4 <sup>+</sup> PD-1 <sup>+</sup> ICOS <sup>+</sup>                                        | 3,138   | 22.9              | 28.6                             | 48.5                             | 1.7E-03               |
|            | CD8 <sup>+</sup> PD-1 <sup>-</sup> HLA-DR <sup>-</sup>                                      | 2,535   | 46.1              | 31.6                             | 22.3                             | 1.00                  |
|            | CD8 <sup>+</sup> PD-1 <sup>-</sup> HLA-DR <sup>+</sup>                                      | 400     | 42.3              | 35.5                             | 22.3                             | 1.00                  |
|            | CD8 <sup>+</sup> PD-1 <sup>+</sup> HLA-DR <sup>-</sup>                                      | 2,710   | 40.0              | 29.3                             | 30.8                             | 1.00                  |
|            | CD8 <sup>+</sup> PD-1 <sup>+</sup> HLA-DR <sup>+</sup>                                      | 1,088   | 9.8               | 9.4                              | 80.8                             | 9.5E-04               |
| B cell     | CD38 <sup>++</sup> CD20 <sup>-</sup> IgM <sup>-</sup> IgD <sup>-</sup>                      | 770     | 3.6               | 6.5                              | 89.9                             | 0.04                  |
|            | CD38 <sup>++</sup> CD20 <sup>-</sup> IgM <sup>+</sup> HLA-DR <sup>+</sup>                   | 220     | 1.8               | 5.5                              | 92.7                             | 0.04                  |
|            | IgM <sup>-</sup> IgD <sup>-</sup> HLA-DR <sup>-</sup>                                       | 379     | 42.0              | 39.1                             | 19.0                             | 1.00                  |
|            | CD38 <sup>+</sup> HLA-DR <sup>++</sup> CD20 <sup>-</sup> CD11c <sup>+</sup>                 | 550     | 16.7              | 18.2                             | 65.1                             | 1.00                  |
|            | IgM <sup>-</sup> IgD <sup>-</sup> HLA-DR <sup>++</sup> CD20 <sup>+</sup> CD11c <sup>+</sup> | 771     | 1.0               | 6.6                              | 92.3                             | 0.01                  |
|            | IgM <sup>-</sup> IgD <sup>-</sup> HLA-DR <sup>+</sup>                                       | 1,774   | 15.7              | 25.3                             | 59.0                             | 1.00                  |
|            | IgA <sup>+</sup> IgM <sup>-</sup> IgD <sup>-</sup>                                          | 336     | 20.2              | 11.0                             | 68.8                             | 1.00                  |
|            | IgM <sup>+</sup> IgD <sup>-</sup>                                                           | 1,126   | 18.7              | 22.6                             | 58.8                             | 1.00                  |
|            | IgM <sup>+</sup> IgD <sup>+</sup> CD11c <sup>-</sup>                                        | 1,762   | 5.6               | 7.3                              | 87.2                             | 0.05                  |
|            | IgM <sup>+</sup> IgD <sup>+</sup> CD11c <sup>+</sup>                                        | 491     | 8.8               | 7.5                              | 83.7                             | 0.69                  |
